# Supplementary material
Source: Royal Society of Chemistry journal article supplement (doi:10.1039/d6bm00291a)
Supplement: d6bm00291a1.pdf [file d6bm00291a1.pdf]

## Supplementary

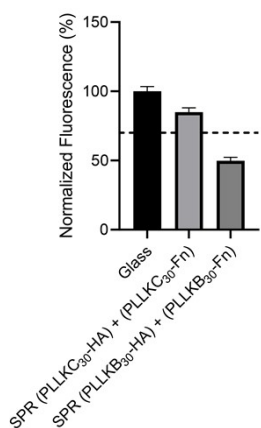

### Supplementary Figure 1. Counterion-dependent cytocompatibility of spray-coated multilayers.

Cytocompatibility assessment revealed a counterion-dependent effect specific to spray-deposited films under identical spray-coating conditions, multilayers fabricated with PLLKB<sub>30</sub> resulted in cytotoxic surfaces, whereas PLLK<sub>30</sub> produced cytocompatible coatings. Round glass slides of 12 mm diameter were used as substrate.

Mean Roughness (Sa, nm)

|                                                       | Glass | Lower regions | Aggregates |
|-------------------------------------------------------|-------|---------------|------------|
| (PLL-HA) <sub>10</sub>                                | 10    | 40–70         | 180–250    |
| Intercalated Fn architecture                          | 10–20 | 40–150        | 150–400    |
| Top-Layer Fn architecture                             | 10–30 | 30–80         | 150–250    |
| SPR (PLL <sub>30</sub> -HA) + (PLL <sub>30</sub> -Fn) | 10–20 | 150–200       | 550–650    |

### Supplementary Table 1. AFM surface roughness analysis of dip- and spray-deposited coatings.

Mean roughness values (Sa, nm) were extracted independently from small defined regions of interest corresponding to three distinct surface features: bare glass areas exposed by needle scratch, lower coating regions, and aggregate features. Measurements were performed using Gwyddion software.
